# Supplementary material for: Medical Specialty Choice and Related Factors of Brazilian Medical Students and Recent Doctors
Source: PubMed Central journal article supplement (PMC4514603; doi:10.1371/journal.pone.0133585), 2015-07-24
Supplement: pone.0133585.s001.pdf [file pone.0133585.s001.pdf]

# S1 Appendix. Questionnaire: Understanding the Factors Underlying Medical Specialty

## Choice.

University:  Medical student (period in school)  Age:  Gender:  M  F

Physician (time since graduation)

Marital status:  Single  Married  Stable union

Birthplace: \_\_\_\_\_

City of origin before medical \_\_\_\_\_

Mother's education:  Illiterate  Elementary school  High school  University

Father's education:  Illiterate  Elementary school  High school  University

Are your parents physicians?  Yes, both.  Yes, only one of them.  No.

What is their medical specialty? Mother: \_\_\_\_\_ Father: \_\_\_\_\_

What type of school did you go for high school?

Public  Private

Did you participate in medical students' study groups? In which medical specialty?

No  Obstetrics and Gynecology  Orthopedics  Pediatrics

Internal medicine and subspecialties  Surgery and subspecialties  Emergence

Subspecialty: \_\_\_\_\_ Other specialty: \_\_\_\_\_

Did you participate in extracurricular internships? In which medical specialty?

No  Obstetrics and Gynecology  Orthopedics  Pediatrics

Internal medicine and subspecialties  Surgery and subspecialties  Emergence  Public health

Subspecialty: \_\_\_\_\_ Other specialty: \_\_\_\_\_

Did you participate in research groups? In which medical specialty?

No  Epidemiology  Primary care  Pediatrics

Internal medicine and subspecialties  Surgery and subspecialties  Emergence  Immunopathology

Subspecialty: \_\_\_\_\_ Other specialty: \_\_\_\_\_

Did you participate in student activisms?

Yes  No

Did you participate in undergraduate teaching assistantship? In which area?

No  Yes, in the area:

Which specialties would you like to pursue?

1st option

2nd option

3rd option

When did you interest in the specialty of choice (1st option)?

Before medical school  1st - 2nd medical school years  3rd - 4th medical school years  During internship

Which specialties would you reject (would not pursue) ?

1st option

2nd option

3rd option

When did you reject the rejected specialty (1st option)?

Before medical school  1st - 2nd medical school years  3rd - 4th medical school years  During internship

Do you want to work in rural area or small towns after graduated?

Yes  No

Score the influence of the following items between 0 to 4 according to your medical specialty choice.

\* 0 is no influence and 4 denotes maximum influence

Financial reason (0) (1) (2) (3) (4)

Perceived ability (0) (1) (2) (3) (4)

Academic experience (0) (1) (2) (3) (4)

Nice internship (curricular) in this specialty (0) (1) (2) (3) (4)

Role models (0) (1) (2) (3) (4)

Family influence (0) (1) (2) (3) (4)

Prestige of specialty (0) (1) (2) (3) (4)

Autonomy potential (0) (1) (2) (3) (4)

Residency time (0) (1) (2) (3) (4)

Personal and family time protection (0) (1) (2) (3) (4)

Research opportunity (0) (1) (2) (3) (4)

Social commitment (0) (1) (2) (3) (4)

Variety of medical problems (0) (1) (2) (3) (4)

Way of work

(0) (1) (2) (3) (4)
