# Supplementary material for: Medical Specialty Choice and Related Factors of Brazilian Medical Students and Recent Doctors
Source: PubMed Central journal article supplement (PMC4514603; doi:10.1371/journal.pone.0133585), 2015-07-24
Supplement: pone.0133585.s003.pdf [file pone.0133585.s003.pdf]

**S1 Table. Demographic characteristics of participants classified by groups of specialties.**

| Demographic characteristics                                     | No. (%)                |                          |                   |                   |
|-----------------------------------------------------------------|------------------------|--------------------------|-------------------|-------------------|
|                                                                 | Controllable lifestyle | Uncontrollable lifestyle |                   |                   |
|                                                                 |                        | PC                       | SS                | IM                |
| Age in years, mean $\pm$ SD                                     | 25.2 ( $\pm$ 2.8)      | 25.0 ( $\pm$ 2.8)        | 25.2 ( $\pm$ 2.7) | 25.1 ( $\pm$ 2.5) |
| Female                                                          | 244 (61.6)             | 268 (82.2)*              | 104 (38.2)*       | 202 (65.4)        |
| City of origin before medical school with > 500,000 inhabitants | 296 (74.7)             | 229 (70.2)               | 198 (72.8)        | 219 (70.9)        |
| Private medical school                                          | 234 (59.1)             | 175 (53.7)               | 157 (57.7)        | 159 (51.5)        |
| Mother's education (university)                                 | 286 (72.2)             | 238 (73.0)               | 198 (72.8)        | 219 (70.9)        |
| Father's education (university)                                 | 282 (71.2)             | 237 (72.7)               | 198 (72.8)        | 218 (70.6)        |
| At least one parent is a medical doctor                         | 107 (27.0)             | 73 (22.4)                | 56 (20.6)         | 81 (26.2)         |

\* $p < 0.0019$  (Fisher test; values specified in the text with OR and CI). PC, primary care; SS, surgical specialties; IM, internal medicine.
